# Supplementary material for: Synergistic Pathogenicity by Coinfection and Sequential Infection with NADC30-like PRRSV and PCV2 in Post-Weaned Pigs
Source: MDPI journal article supplement (doi:10.3390/v14020193), 2022-01-20
Supplement: s1 [file s1]

## Supplementary material files

Table S1 Reference form for clinical score

| Pig No. | Mental states | Feed intake | Vomit | Diarrhea | Respiratory symptom | Erythra | Purple ears | Emaciation | States of thick coat | Other symptoms |
|---------|---------------|-------------|-------|----------|---------------------|---------|-------------|------------|----------------------|----------------|
| Group   |               |             |       |          |                     |         |             |            |                      |                |

Note: The content of each item is 0-3 points, with 0 representing no clinical symptoms, 1 representing mild clinical symptoms, 2 representing moderate clinical symptoms, and 3 representing severe clinical symptoms. Each pig needs to be carefully observed and scored daily. Taking pig No. 1 as an example, it was eventually necessary to sum the individual scores to give a total score of pig No. 1, and then the figure was made along with the scores of the other pigs within the same group.

Table S2 Clinical symptom score data for pigs in each group

| dpi | Groups |   |   |      |   |   |            |   |   |               |   |    |            |    |    |       |   |   |
|-----|--------|---|---|------|---|---|------------|---|---|---------------|---|----|------------|----|----|-------|---|---|
|     | PBS    |   |   | PCV2 |   |   | PCV2-PRRSV |   |   | Co-PRRSV-PCV2 |   |    | PRRSV-PCV2 |    |    | PRRSV |   |   |
| 1   | 0      | 0 | 0 | 0    | 0 | 0 | 0          | 0 | 0 | 0             | 0 | 0  | 0          | 0  | 0  | 0     | 0 | 0 |
| 2   | 0      | 0 | 0 | 0    | 0 | 0 | 0          | 0 | 0 | 0             | 0 | 0  | 0          | 0  | 0  | 0     | 0 | 0 |
| 3   | 0      | 0 | 0 | 0    | 0 | 0 | 0          | 0 | 0 | 0             | 0 | 3  | 2          | 0  | 0  | 0     | 0 | 0 |
| 4   | 0      | 0 | 0 | 1    | 0 | 0 | 0          | 0 | 0 | 1             | 1 | 3  | 4          | 1  | 0  | 1     | 1 | 0 |
| 5   | 0      | 0 | 0 | 1    | 0 | 1 | 1          | 2 | 1 | 4             | 2 | 4  | 6          | 3  | 3  | 4     | 4 | 2 |
| 6   | 0      | 0 | 0 | 1    | 0 | 2 | 1          | 2 | 1 | 4             | 3 | 4  | 4          | 4  | 6  | 7     | 8 | 2 |
| 7   | 0      | 0 | 0 | 1    | 0 | 2 | 1          | 2 | 1 | 5             | 3 | 6  | 5          | 4  | 6  | 7     | 9 | 2 |
| 8   | 0      | 0 | 0 | 2    | 0 | 2 | 2          | 0 | 2 | 5             | 7 | 5  | 10         | 7  | 8  | 6     | 7 | 3 |
| 9   | 0      | 0 | 0 | 3    | 3 | 1 | 2          | 2 | 3 | 4             | 9 | 10 | 12         | 6  | 7  | 10    | 8 | 8 |
| 10  | 0      | 0 | 0 | 2    | 1 | 3 | 3          | 3 | 2 | 9             | 4 | 10 | 6          | 7  | 6  | 7     | 6 | 5 |
| 11  | 0      | 0 | 0 | 3    | 3 | 1 | 4          | 3 | 3 | 12            | 6 | 13 | 8          | 8  | 7  | 7     | 7 | 3 |
| 12  | 0      | 0 | 0 | 0    | 3 | 5 | 4          | 4 | 6 | 12            | 4 | 10 | 8          | 11 | 10 | 7     | 3 | 3 |
| 13  | 0      | 0 | 0 | 1    | 2 | 2 | 2          | 5 | 3 | 4             | 6 | 10 | 5          | 8  | 7  | 4     | 1 | 3 |
| 14  | 0      | 0 | 0 | 2    | 1 | 2 | 3          | 3 | 2 | 5             | 4 | 5  | 4          | 5  | 7  | 3     | 2 | 3 |
| 15  | 0      | 0 | 0 | 2    | 1 | 2 | 2          | 4 | 2 | 5             | 3 | 4  | 6          | 7  | 6  | 3     | 4 | 1 |
| 16  | 0      | 0 | 0 | 3    | 0 | 0 | 4          | 4 | 4 | 3             | 3 | 5  | 9          | 5  | 8  | 4     | 5 | 2 |

---

|    |   |   |   |   |   |   |   |   |   |   |   |   |   |   |   |   |   |   |
|----|---|---|---|---|---|---|---|---|---|---|---|---|---|---|---|---|---|---|
| 17 | 0 | 0 | 0 | 1 | 1 | 1 | 6 | 7 | 6 | 3 | 1 | 7 | 5 | 5 | 8 | 2 | 1 | 4 |
| 18 | 0 | 0 | 0 | 2 | 2 | 0 | 6 | 4 | 5 | 2 | 0 | 9 | 2 | 5 | 5 | 3 | 2 | 1 |
| 19 | 0 | 0 | 0 | 3 | 1 | 0 | 3 | 5 | 3 | 1 | 0 | 8 | 2 | 2 | 3 | 0 | 0 | 1 |
| 20 | 0 | 0 | 0 | 0 | 0 | 0 | 4 | 4 | 5 | 0 | 0 | 1 | 1 | 2 | 4 | 2 | 1 | 3 |
| 21 | 0 | 0 | 0 | 0 | 0 | 1 | 5 | 4 | 3 | 2 | 0 | 0 | 0 | 0 | 0 | 0 | 1 | 0 |

---

Note: The score in the table is the sum of all clinical symptom scores of a pig.
